# Supplementary material for: Genome-wide mapping of 5-hydroxymethylcytosines in circulating cell-free DNA as a non-invasive approach for early detection of hepatocellular carcinoma
Source: PubMed Central journal article supplement — Gut. 2019 Jul 29;68(12):2195–205. doi: 10.1136/gutjnl-2019-318882 (PMC6872444; doi:10.1136/gutjnl-2019-318882), 2019-07-29
Supplement: gutjnl-2019-318882supp002.pdf [file gutjnl-2019-318882supp002.pdf]

**Supplementary Table 1.** Characteristics of the study subjects.

| Characteristic          | <u>Training Set</u> |           | <u>Validation Set 1</u> |           |
|-------------------------|---------------------|-----------|-------------------------|-----------|
|                         | No.                 | %/Value   | No.                     | %/Value   |
| <b>Healthy Subjects</b> | 269                 |           | 124                     |           |
| Age - yr                |                     | 48.1±11.1 |                         | 47.8±12.0 |
| Sex                     |                     |           |                         |           |
| Male                    | 169                 | 62.8%     | 79                      | 63.7%     |
| Female                  | 100                 | 37.2%     | 45                      | 36.3%     |
| AFP                     |                     |           |                         |           |
| >400 ng/mL              | 0                   | 0%        | 0                       | 0%        |
| ≤400 ng/mL              | 257                 | 95.5%     | 119                     | 96.0%     |
| Missing                 | 12                  | 4.5%      | 5                       | 4.0%      |
| <b>Benign Lesions</b>   | 253                 |           | 132                     |           |
| Age - yr                |                     | 50.0±12.8 |                         | 52.2±11.7 |
| Sex                     |                     |           |                         |           |
| Male                    | 98                  | 62.8%     | 51                      | 38.6%     |
| Female                  | 155                 | 37.2%     | 81                      | 61.4%     |
| AFP                     |                     |           |                         |           |
| > 400 ng/mL             | 0                   | 0%        | 1                       | 0.9%      |
| ≤ 400 ng/mL             | 251                 | 99.2%     | 131                     | 99.2%     |
| Missing                 | 2                   | 0.8%      | 0                       | 0%        |
| <b>CHB</b>              | 190                 |           | 96                      |           |
| Age - yr                |                     | 35.8±10.2 |                         | 35.7±10.7 |
| Sex                     |                     |           |                         |           |
| Male                    | 131                 | 68.9%     | 62                      | 64.6%     |
| Female                  | 59                  | 31.0%     | 34                      | 35.4%     |
| AFP                     |                     |           |                         |           |
| > 400 ng/mL             | 2                   | 1.1%      | 4                       | 4.2%      |
| ≤ 400 ng/mL             | 90                  | 47.4%     | 51                      | 53.1%     |
| Missing                 | 98                  | 51.6%     | 41                      | 42.7%     |
| <b>LC</b>               | 73                  |           | 33                      |           |
| Age - yr                |                     | 54.0±11.3 |                         | 52.7±11.2 |
| Sex                     |                     |           |                         |           |
| Male                    | 50                  | 68.5%     | 22                      | 66.7%     |
| Female                  | 23                  | 31.5%     | 11                      | 33.3%     |
| AFP                     |                     |           |                         |           |
| > 400 ng/mL             | 2                   | 2.7%      | 1                       | 3.0%      |
| ≤ 400 ng/mL             | 68                  | 93.2%     | 32                      | 97.0%     |
| Missing                 | 3                   | 4.1%      | 0                       | 0%        |
| <b>HCC</b>              | 335                 |           | 809                     |           |
| Age - yr                |                     | 56.0±10.0 |                         | 57.4±11.3 |
| Sex                     |                     |           |                         |           |
| Male                    | 282                 | 84.1%     | 675                     | 83.4%     |
| Female                  | 53                  | 15.8%     | 134                     | 16.6%     |

|                        |     |          |     |          |
|------------------------|-----|----------|-----|----------|
| BMI                    |     | 23.7±3.0 |     | 23.5±3.1 |
| Smoking                |     |          |     |          |
| Yes                    | 26  | 7.8%     | 47  | 5.8%     |
| No                     | 46  | 13.7%    | 119 | 14.7%    |
| Missing                | 263 | 78.5%    | 643 | 79.5%    |
| Alcohol                |     |          |     |          |
| Yes                    | 22  | 6.6%     | 40  | 4.9%     |
| No                     | 49  | 14.6%    | 127 | 15.7%    |
| Missing                | 264 | 78.8%    | 642 | 79.4%    |
| AFP                    |     |          |     |          |
| > 400 ng/mL            | 72  | 21.5%    | 273 | 33.7%    |
| ≤ 400 ng/mL            | 261 | 77.9%    | 529 | 65.4%    |
| Missing                | 2   | 0.6%     | 7   | 0.9%     |
| CHB History            |     |          |     |          |
| Yes                    | 327 | 97.6%    | 667 | 82.4%    |
| No                     | 8   | 2.4%     | 139 | 17.2%    |
| Missing                | 0   | 0%       | 3   | 0.4%     |
| LC History             |     |          |     |          |
| Yes                    | 236 | 70.4%    | 518 | 64.0%    |
| No                     | 99  | 29.6%    | 288 | 35.6%    |
| Missing                | 0   | 0%       | 3   | 0.4%     |
| Tumor Size             |     |          |     |          |
| > 2.0 cm               | 215 | 64.2%    | 637 | 78.7%    |
| ≤ 2.0 cm               | 116 | 34.6%    | 104 | 12.9%    |
| Missing                | 4   | 1.2%     | 68  | 8.4%     |
| BCLC Stage             |     |          |     |          |
| 0                      | 98  | 29.2%    | 46  | 5.7%     |
| A                      | 237 | 70.7%    | 174 | 21.5%    |
| B                      | 0   | 0%       | 294 | 36.3%    |
| C                      | 0   | 0%       | 148 | 18.3%    |
| Missing                | 0   | 0%       | 147 | 18.2%    |
| Pathology Availability |     |          |     |          |
| Yes                    | 311 | 92.8%    | 580 | 71.7%    |
| No                     | 24  | 7.2%     | 229 | 28.3%    |

Notes: The training set and validation set 1 are comprised of HCC patients and controls recruited from Zhongshan Hospital, Fudan University and the Eastern Hepatobiliary Surgery Hospital, as well as the combined patients with a history of CHB infection or LC from all participating hospitals. AFP:  $\alpha$ -fetoprotein; BCLC: Barcelona Clinic Liver Cancer staging system; BMI: body mass index; CHB: chronic hepatitis B virus infection; HCC: hepatocellular carcinoma; LC: liver cirrhosis.
