# Supplementary material for: Genome-wide mapping of 5-hydroxymethylcytosines in circulating cell-free DNA as a non-invasive approach for early detection of hepatocellular carcinoma
Source: PubMed Central journal article supplement — Gut. 2019 Jul 29;68(12):2195–205. doi: 10.1136/gutjnl-2019-318882 (PMC6872444; doi:10.1136/gutjnl-2019-318882), 2019-07-29
Supplement: gutjnl-2019-318882supp011.pdf [file gutjnl-2019-318882supp011.pdf]

**Supplementary Table 3.** Top 100 differentially modified genes between early HCC and controls in the training set.

| Gene      | Coefficient <sup>a</sup> | p-value | AUC (Early HCC vs. Controls) <sup>b</sup> | TCGA log <sub>2</sub> (FC) <sup>c</sup> | Differential Gene (TCGA) <sup>c</sup> |
|-----------|--------------------------|---------|-------------------------------------------|-----------------------------------------|---------------------------------------|
| SOX9      | 0.722                    | 5.3E-44 | 81.30%                                    | 0.142                                   | No                                    |
| PDX1      | 0.730                    | 5.5E-35 | 76.50%                                    | -0.211                                  | No                                    |
| ESRRG     | 0.390                    | 1.4E-33 | 79.50%                                    | -0.583                                  | Yes                                   |
| EPB41L4A  | 0.579                    | 7.3E-30 | 75.00%                                    | -0.249                                  | Yes                                   |
| TNFRSF11B | 0.528                    | 3.6E-28 | 75.20%                                    | -0.342                                  | Yes                                   |
| GABRB3    | 0.329                    | 7.7E-28 | 76.30%                                    | -0.877                                  | Yes                                   |
| CHST9     | 0.398                    | 2.1E-27 | 75.50%                                    | -0.299                                  | Yes                                   |
| TMCC3     | 0.916                    | 4.7E-26 | 72.60%                                    | 0.097                                   | No                                    |
| A2M       | 0.761                    | 4.8E-26 | 72.40%                                    | -0.106                                  | Yes                                   |
| ADAMTS9   | 0.580                    | 1.2E-25 | 74.10%                                    | 0.195                                   | Yes                                   |
| ENPP2     | 0.876                    | 3.3E-25 | 67.40%                                    | 0.088                                   | No                                    |
| EVC       | 0.703                    | 8.4E-25 | 76.20%                                    | -0.176                                  | No                                    |
| FAT1      | 0.335                    | 2.2E-23 | 74.10%                                    | 0.153                                   | Yes                                   |
| APOA5     | 0.703                    | 6.7E-22 | 70.90%                                    | -0.225                                  | Yes                                   |
| ADH1B     | 0.448                    | 4.4E-21 | 72.30%                                    | -0.244                                  | Yes                                   |
| SERPINA10 | 0.479                    | 4.5E-21 | 72.00%                                    | -0.119                                  | Yes                                   |
| NPBWR1    | 0.651                    | 2.0E-20 | 73.10%                                    | -0.877                                  | Yes                                   |
| APOC1     | 0.729                    | 2.9E-20 | 69.80%                                    | -0.045                                  | Yes                                   |
| CYB5A     | 0.984                    | 3.5E-20 | 67.90%                                    | -0.081                                  | Yes                                   |
| ADH4      | 0.445                    | 4.2E-20 | 72.30%                                    | -0.386                                  | Yes                                   |
| ARSJ      | 0.397                    | 6.3E-20 | 69.00%                                    | -0.209                                  | Yes                                   |
| STAT1     | 0.809                    | 1.0E-19 | 69.30%                                    | 0.052                                   | No                                    |
| FRMD6     | 0.714                    | 1.9E-19 | 70.20%                                    | -0.125                                  | No                                    |
| EXT1      | 0.604                    | 5.6E-19 | 67.90%                                    | 0.038                                   | No                                    |
| CYP2C18   | 0.587                    | 6.7E-19 | 68.40%                                    | -0.215                                  | Yes                                   |
| ABCA1     | 0.920                    | 1.0E-18 | 70.30%                                    | -0.079                                  | Yes                                   |
| APOE      | 0.560                    | 2.8E-18 | 68.80%                                    | 0.016                                   | No                                    |
| CYP26C1   | 0.673                    | 1.0E-17 | 68.70%                                    | 0.227                                   | No                                    |
| TNFSF15   | 0.611                    | 1.2E-17 | 67.20%                                    | 0.416                                   | Yes                                   |
| RAPH1     | 0.430                    | 1.4E-17 | 69.10%                                    | -0.139                                  | No                                    |
| PDE7B     | 0.736                    | 1.8E-17 | 69.90%                                    | -0.330                                  | Yes                                   |
| RGL1      | 0.784                    | 4.2E-17 | 67.50%                                    | -0.078                                  | No                                    |
| ADAMTS16  | 0.298                    | 4.6E-17 | 70.90%                                    | 0.723                                   | Yes                                   |
| MEIS2     | 0.398                    | 6.5E-17 | 71.40%                                    | 0.089                                   | Yes                                   |
| PROX1     | 0.239                    | 6.9E-17 | 69.70%                                    | -0.058                                  | No                                    |
| FAM13C    | 0.361                    | 8.9E-17 | 69.40%                                    | 0.260                                   | Yes                                   |
| TMCO5A    | 0.412                    | 1.0E-16 | 71.80%                                    | 0.539                                   | No                                    |
| PLXNA4    | -0.690                   | 1.2E-16 | 68.00%                                    | -0.534                                  | Yes                                   |
| APOB      | 0.286                    | 1.7E-16 | 70.50%                                    | -0.065                                  | Yes                                   |
| SMIM12    | -0.863                   | 2.8E-16 | 67.50%                                    | -0.027                                  | No                                    |
| POR       | 0.635                    | 4.0E-16 | 67.50%                                    | -0.029                                  | No                                    |
| OSMR      | 0.485                    | 4.5E-16 | 67.30%                                    | -0.064                                  | No                                    |
| OTX1      | 0.575                    | 4.9E-16 | 69.10%                                    | 1.839                                   | Yes                                   |
| CECR2     | -0.829                   | 6.0E-16 | 66.70%                                    | 0.008                                   | No                                    |

|          |        |         |        |        |     |
|----------|--------|---------|--------|--------|-----|
| GPRC5C   | 0.657  | 6.4E-16 | 67.60% | 0.003  | No  |
| SOWAHC   | 0.577  | 8.3E-16 | 66.90% | -0.090 | Yes |
| FMO3     | 0.296  | 1.4E-15 | 69.60% | -0.167 | Yes |
| TBX3     | 0.375  | 1.5E-15 | 70.00% | 0.001  | No  |
| RAPGEF5  | 0.787  | 1.7E-15 | 67.50% | 0.002  | No  |
| LBP      | 0.597  | 1.8E-15 | 70.20% | -0.087 | Yes |
| TAT      | 0.652  | 1.9E-15 | 65.20% | -0.277 | Yes |
| NUAK1    | 0.373  | 2.0E-15 | 68.70% | 0.200  | Yes |
| CYP27A1  | 0.428  | 2.3E-15 | 67.80% | -0.088 | Yes |
| CLVS2    | 0.317  | 2.3E-15 | 67.70% | 0.860  | No  |
| DNAH5    | 0.320  | 2.8E-15 | 71.30% | -0.099 | No  |
| ERRFI1   | 0.871  | 4.0E-15 | 66.30% | -0.137 | Yes |
| MFAP3L   | -0.675 | 4.5E-15 | 67.50% | -0.368 | Yes |
| ROBO1    | 0.280  | 5.2E-15 | 66.10% | 0.406  | Yes |
| TEX14    | -1.071 | 6.0E-15 | 66.30% | 0.095  | No  |
| FGD6     | 1.174  | 6.0E-15 | 63.10% | 0.126  | Yes |
| TSHZ2    | 0.318  | 7.0E-15 | 68.80% | -0.007 | No  |
| SLC16A11 | 0.635  | 1.0E-14 | 65.70% | 0.096  | No  |
| OCA2     | 0.333  | 1.4E-14 | 72.00% | 0.338  | No  |
| FAM20A   | 0.453  | 1.4E-14 | 68.50% | 0.027  | No  |
| SLC10A1  | 0.574  | 1.5E-14 | 67.10% | -0.360 | Yes |
| MAT1A    | 0.617  | 1.7E-14 | 66.50% | -0.174 | Yes |
| ZNF532   | 0.670  | 1.8E-14 | 64.10% | 0.203  | Yes |
| NNMT     | 0.723  | 2.0E-14 | 68.20% | -0.341 | Yes |
| RELN     | 0.299  | 2.2E-14 | 69.20% | -0.314 | Yes |
| OAF      | 0.669  | 2.6E-14 | 67.10% | -0.070 | Yes |
| YAP1     | 0.282  | 2.7E-14 | 67.70% | 0.041  | No  |
| SOX13    | 0.508  | 2.7E-14 | 67.80% | 0.159  | Yes |
| VCAN     | 0.432  | 3.3E-14 | 68.20% | 0.135  | No  |
| FBXL7    | 0.234  | 3.6E-14 | 65.20% | 0.161  | Yes |
| HOMER2   | -0.767 | 3.7E-14 | 64.60% | -0.077 | Yes |
| SDC2     | 0.300  | 3.8E-14 | 69.10% | 0.041  | Yes |
| SALL1    | 0.344  | 4.1E-14 | 68.10% | -0.080 | Yes |
| ZKSCAN1  | 0.787  | 4.1E-14 | 66.10% | 0.084  | Yes |
| KLF15    | 0.594  | 4.7E-14 | 66.30% | 0.023  | No  |
| SPATA18  | 0.378  | 4.7E-14 | 66.70% | -0.386 | Yes |
| CNN3     | 0.441  | 4.9E-14 | 66.50% | 0.054  | Yes |
| PQLC1    | 0.651  | 5.6E-14 | 67.10% | -0.032 | No  |
| GOT2     | 0.675  | 6.3E-14 | 67.60% | -0.082 | Yes |
| PAH      | 0.208  | 6.9E-14 | 68.30% | -0.096 | Yes |
| NEDD4L   | 0.893  | 7.4E-14 | 67.20% | 0.157  | Yes |
| TOX3     | 0.190  | 7.6E-14 | 68.40% | 0.032  | No  |
| SDC1     | 0.605  | 8.3E-14 | 66.10% | -0.004 | No  |
| HIC1     | 0.464  | 8.4E-14 | 65.70% | -0.041 | No  |
| TF       | 0.445  | 1.0E-13 | 68.50% | -0.089 | Yes |
| MT1M     | 0.532  | 1.2E-13 | 65.70% | -0.889 | Yes |
| GABRG3   | 0.245  | 1.4E-13 | 70.30% | 0.304  | No  |

|        |        |         |        |        |     |
|--------|--------|---------|--------|--------|-----|
| RBMS3  | 0.269  | 1.4E-13 | 65.50% | -0.273 | Yes |
| ALDOB  | 0.440  | 1.4E-13 | 68.10% | -0.192 | Yes |
| B3GNT9 | 0.494  | 1.5E-13 | 66.30% | -0.022 | No  |
| EVL    | -1.135 | 1.5E-13 | 65.40% | -0.021 | No  |
| FREM2  | 0.288  | 1.5E-13 | 68.50% | -1.240 | Yes |
| NUP214 | -1.368 | 1.8E-13 | 66.10% | 0.080  | Yes |
| MYO1B  | 0.372  | 1.9E-13 | 67.40% | -0.097 | Yes |
| OPRD1  | -0.596 | 1.9E-13 | 65.30% | 0.038  | No  |
| ISL2   | 0.535  | 2.0E-13 | 67.00% | 2.011  | Yes |

Notes: <sup>a</sup> Coefficient was based on the logistic regression adjusted for age and gender in the training set. <sup>b</sup> AUC was calculated for each gene in the training set. <sup>c</sup> The  $\log_2$  (FC) for gene expression was calculated between tumors and normal tissues from TCGA. A 5% FDR (false discovery rate) was considered significant for the TCGA data. AUC: area under curve; Controls: patients with benign liver lesions and healthy individuals; FC: fold change; HCC: hepatocellular carcinoma; TCGA: The Cancer Genome Atlas.
