# Supplementary material for: Genome-wide mapping of 5-hydroxymethylcytosines in circulating cell-free DNA as a non-invasive approach for early detection of hepatocellular carcinoma
Source: PubMed Central journal article supplement — Gut. 2019 Jul 29;68(12):2195–205. doi: 10.1136/gutjnl-2019-318882 (PMC6872444; doi:10.1136/gutjnl-2019-318882), 2019-07-29
Supplement: gutjnl-2019-318882supp012.pdf [file gutjnl-2019-318882supp012.pdf]

**Supplementary Table 4.** Top 100 differentially modified genes between early HCC and CHB/LC in the training set.

| <b>Gene</b> | <b>Coefficient <sup>a</sup></b> | <b>p-value</b> | <b>AUC (Early HCC vs. CHB/LC) <sup>b</sup></b> |
|-------------|---------------------------------|----------------|------------------------------------------------|
| FIGN        | 0.275                           | 7.13E-12       | 75.00%                                         |
| STAU1       | 1.276                           | 6.29E-10       | 60.50%                                         |
| SYN2        | -0.643                          | 4.63E-08       | 59.50%                                         |
| TBCE        | 0.851                           | 6.18E-08       | 62.70%                                         |
| ATP10B      | -0.434                          | 1.37E-07       | 57.80%                                         |
| CD5L        | -0.481                          | 1.46E-07       | 62.30%                                         |
| HS3ST2      | -0.425                          | 1.53E-07       | 58.90%                                         |
| GML         | -0.530                          | 2.77E-07       | 62.30%                                         |
| PIEZO2      | 0.697                           | 3.04E-07       | 58.70%                                         |
| TRAPPC6B    | 0.685                           | 4.08E-07       | 59.20%                                         |
| RPH3A       | -0.563                          | 4.51E-07       | 62.80%                                         |
| CAMK1D      | 0.839                           | 6.13E-07       | 62.00%                                         |
| GPLD1       | 0.671                           | 7.78E-07       | 59.30%                                         |
| USP14       | 0.652                           | 9.76E-07       | 59.80%                                         |
| RNF175      | -0.528                          | 1.14E-06       | 57.20%                                         |
| CA8         | -0.368                          | 1.29E-06       | 61.50%                                         |
| MARCH1      | -0.299                          | 1.33E-06       | 60.30%                                         |
| PDZK1       | 0.438                           | 1.50E-06       | 63.20%                                         |
| TMC2        | -0.521                          | 1.70E-06       | 62.20%                                         |
| MUC17       | -0.417                          | 1.87E-06       | 57.20%                                         |
| HOPX        | -0.431                          | 1.95E-06       | 61.90%                                         |
| IPPK        | 0.685                           | 2.08E-06       | 63.50%                                         |
| PTPRO       | -0.514                          | 2.21E-06       | 61.90%                                         |
| RPRD2       | 0.694                           | 2.32E-06       | 60.70%                                         |
| C4orf22     | -0.268                          | 2.34E-06       | 62.40%                                         |
| CCM2L       | -0.528                          | 2.41E-06       | 58.90%                                         |
| SYNDIG1     | -0.463                          | 2.51E-06       | 59.60%                                         |
| KIR3DX1     | -0.420                          | 2.64E-06       | 55.70%                                         |
| DRG1        | 0.857                           | 2.82E-06       | 58.70%                                         |
| HDLBP       | 0.913                           | 3.30E-06       | 59.90%                                         |
| SIAH3       | -0.573                          | 3.44E-06       | 64.10%                                         |
| NETO2       | -0.467                          | 3.65E-06       | 59.00%                                         |
| CPO         | -0.540                          | 4.00E-06       | 60.40%                                         |
| CACNA1A     | -0.539                          | 4.21E-06       | 59.50%                                         |
| MCOLN2      | -0.505                          | 4.28E-06       | 60.10%                                         |
| CREB5       | -0.606                          | 4.33E-06       | 61.70%                                         |
| SLC24A2     | -0.325                          | 4.42E-06       | 61.10%                                         |
| JUN         | -0.398                          | 4.43E-06       | 60.80%                                         |
| STK32B      | -0.471                          | 4.53E-06       | 57.30%                                         |
| COL15A1     | -0.493                          | 5.07E-06       | 56.80%                                         |

|          |        |          |        |
|----------|--------|----------|--------|
| PCYOX1   | 0.603  | 5.14E-06 | 60.10% |
| ZHX2     | 0.843  | 5.30E-06 | 62.90% |
| ARFGEF2  | 1.164  | 5.50E-06 | 56.60% |
| BPTF     | 1.037  | 5.80E-06 | 56.10% |
| BCL6     | 0.600  | 5.91E-06 | 62.80% |
| DSP      | 0.492  | 6.03E-06 | 59.40% |
| ADCK3    | 0.755  | 6.27E-06 | 61.30% |
| THRB     | 0.395  | 6.74E-06 | 57.30% |
| NNT      | 0.546  | 6.97E-06 | 60.00% |
| ERICH5   | 0.431  | 7.43E-06 | 61.00% |
| NLRP1    | -0.503 | 7.55E-06 | 57.50% |
| CDK5RAP2 | 0.883  | 7.86E-06 | 60.70% |
| TADA1    | 0.594  | 8.31E-06 | 58.70% |
| IKZF3    | -0.658 | 8.48E-06 | 61.40% |
| PTPN11   | 0.969  | 8.49E-06 | 55.90% |
| PEBP4    | -0.739 | 8.52E-06 | 61.10% |
| SDHC     | 0.559  | 8.66E-06 | 64.00% |
| CD300LD  | -0.517 | 9.70E-06 | 59.40% |
| MYLK3    | -0.622 | 1.01E-05 | 58.60% |
| KLB      | 0.383  | 1.03E-05 | 61.20% |
| MTFR1    | 0.594  | 1.05E-05 | 60.10% |
| CPNE4    | -0.365 | 1.08E-05 | 61.40% |
| CHCHD6   | -0.465 | 1.09E-05 | 62.50% |
| CBFA2T2  | 0.941  | 1.16E-05 | 57.10% |
| ABL2     | 0.624  | 1.16E-05 | 60.60% |
| ZNF491   | -0.499 | 1.23E-05 | 60.40% |
| METAP2   | 0.566  | 1.26E-05 | 59.90% |
| RBFOX3   | -0.442 | 1.34E-05 | 61.10% |
| ITIH2    | 0.252  | 1.35E-05 | 62.20% |
| ATRN     | 0.697  | 1.36E-05 | 56.00% |
| F2       | 0.385  | 1.37E-05 | 62.30% |
| RAD54L2  | 0.629  | 1.45E-05 | 63.90% |
| DKK4     | 0.517  | 1.45E-05 | 60.40% |
| MPHOSPH8 | 0.945  | 1.45E-05 | 58.40% |
| AIPL1    | -0.527 | 1.46E-05 | 60.70% |
| CPAMD8   | -0.494 | 1.50E-05 | 58.30% |
| ATP10A   | -0.235 | 1.51E-05 | 60.30% |
| WSCD2    | -0.362 | 1.53E-05 | 58.50% |
| UNC79    | -0.389 | 1.61E-05 | 58.40% |
| AOX1     | 0.394  | 1.66E-05 | 62.50% |
| CTPS1    | 0.691  | 1.69E-05 | 58.90% |
| CD53     | -0.354 | 1.69E-05 | 56.60% |
| IRF4     | -0.536 | 1.73E-05 | 57.50% |

|           |        |          |        |
|-----------|--------|----------|--------|
| LILRB4    | -0.299 | 1.73E-05 | 54.70% |
| USP6      | -0.530 | 1.74E-05 | 55.30% |
| GPR26     | -0.354 | 1.75E-05 | 58.10% |
| KLRG1     | -0.532 | 1.77E-05 | 60.90% |
| PAR6G     | 0.436  | 1.81E-05 | 63.10% |
| SYCP1     | -0.276 | 1.87E-05 | 59.70% |
| KCNIP1    | -0.550 | 1.87E-05 | 62.30% |
| SAP130    | 0.871  | 1.98E-05 | 58.50% |
| KIAA0226L | -0.439 | 1.99E-05 | 57.70% |
| COG2      | 0.535  | 2.22E-05 | 59.30% |
| EDN3      | -0.416 | 2.24E-05 | 61.40% |
| ZNF445    | 0.798  | 2.26E-05 | 59.80% |
| URB2      | 0.660  | 2.31E-05 | 58.80% |
| GAB4      | -0.325 | 2.36E-05 | 58.50% |
| POGZ      | 0.590  | 2.38E-05 | 61.20% |
| SCN10A    | -0.372 | 2.41E-05 | 61.00% |
| SYT16     | -0.269 | 2.42E-05 | 59.80% |

Notes: <sup>a</sup> Coefficient was based on the logistic regression adjusted for age and gender for each gene in the training set. <sup>b</sup> AUC was calculated for each gene in the training set. AUC: area under curve; CHB: chronic hepatitis B virus infection; HCC: hepatocellular carcinoma; LC: liver cirrhosis.
