# Supplementary figures and images for: Genome-wide mapping of 5-hydroxymethylcytosines in circulating cell-free DNA as a non-invasive approach for early detection of hepatocellular carcinoma
Source: PubMed Central journal article supplement — Gut. 2019 Jul 29;68(12):2195–205. doi: 10.1136/gutjnl-2019-318882 (PMC6872444; doi:10.1136/gutjnl-2019-318882), 2019-07-29

**A**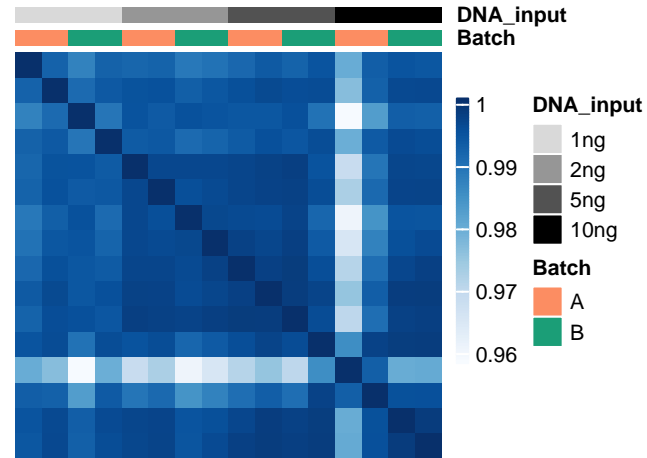**B**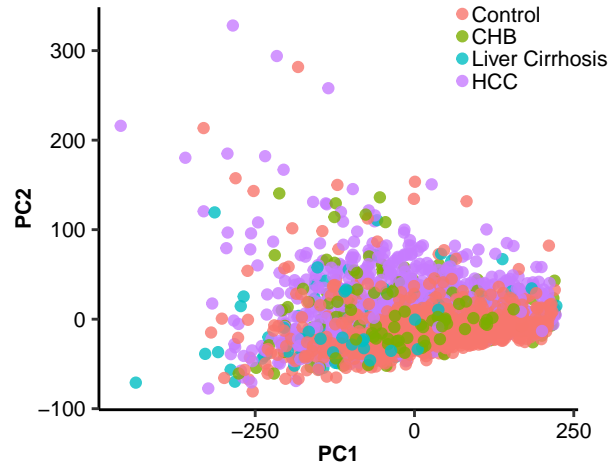

Supplement: gutjnl-2019-318882supp010.pdf [file gutjnl-2019-318882supp010.pdf]
